# Supplementary material for: Prognostic nomogram based on the metastatic lymph node ratio for gastric neuroendocrine tumour: SEER database analysis
Source: PubMed Central journal article supplement — ESMO Open. 2020 Apr 5;5(2):e000632. doi: 10.1136/esmoopen-2019-000632 (PMC7174016; doi:10.1136/esmoopen-2019-000632), 2020-04-05
Supplement: esmoopen-2019-000632supp001.pdf [file esmoopen-2019-000632supp001.pdf]

**Supplement 1. Characteristics of histological differentiation and TNM staging (8th edition) in g-NET patients receiving chemotherapy or radiotherapy.**

| Character             | Chemotherapy  |                | Radiotherapy  |                   |
|-----------------------|---------------|----------------|---------------|-------------------|
|                       | Performed (%) | No/Unknown (%) | Performed (%) | Not Performed (%) |
| Total                 | 65 (100.0)    | 250 (100.0)    | 33 (100.0)    | 282 (100.0)       |
| Differentiation       |               |                |               |                   |
| Well/moderate         | 7 (10.8)      | 143 (57.2)     | 5 (15.2)      | 145 (51.4)        |
| Poor/undifferentiated | 52 (80.0)     | 58 (23.2)      | 26 (78.8)     | 84 (29.8)         |
| Unknown               | 6 (9.2)       | 49 (19.6)      | 2 (6.1)       | 53 (18.8)         |
| TNM staging           |               |                |               |                   |
| I                     | 1 (1.5)       | 40 (16.0)      | 1 (3.0)       | 40 (14.2)         |
| II                    | 10 (15.4)     | 71 (28.4)      | 5 (15.2)      | 76 (27.0)         |
| III                   | 39 (60.0)     | 95 (38.0)      | 23 (69.7)     | 111 (39.4)        |
| IV                    | 14 (21.5)     | 33 (13.2)      | 4 (12.1)      | 43 (15.2)         |
| Unknown               | 1 (1.5)       | 11 (4.4)       | 0 (0.0)       | 12 (4.3)          |

Abbreviations: TNM= tumor, node, metastasis; g-NET= gastric neuroendocrine tumor.
